# Supplementary figures and images for: Histone H1 Post-Translational Modifications: Update and Future Perspectives
Source: MDPI journal article supplement (doi:10.3390/ijms21165941), 2020-08-18

A

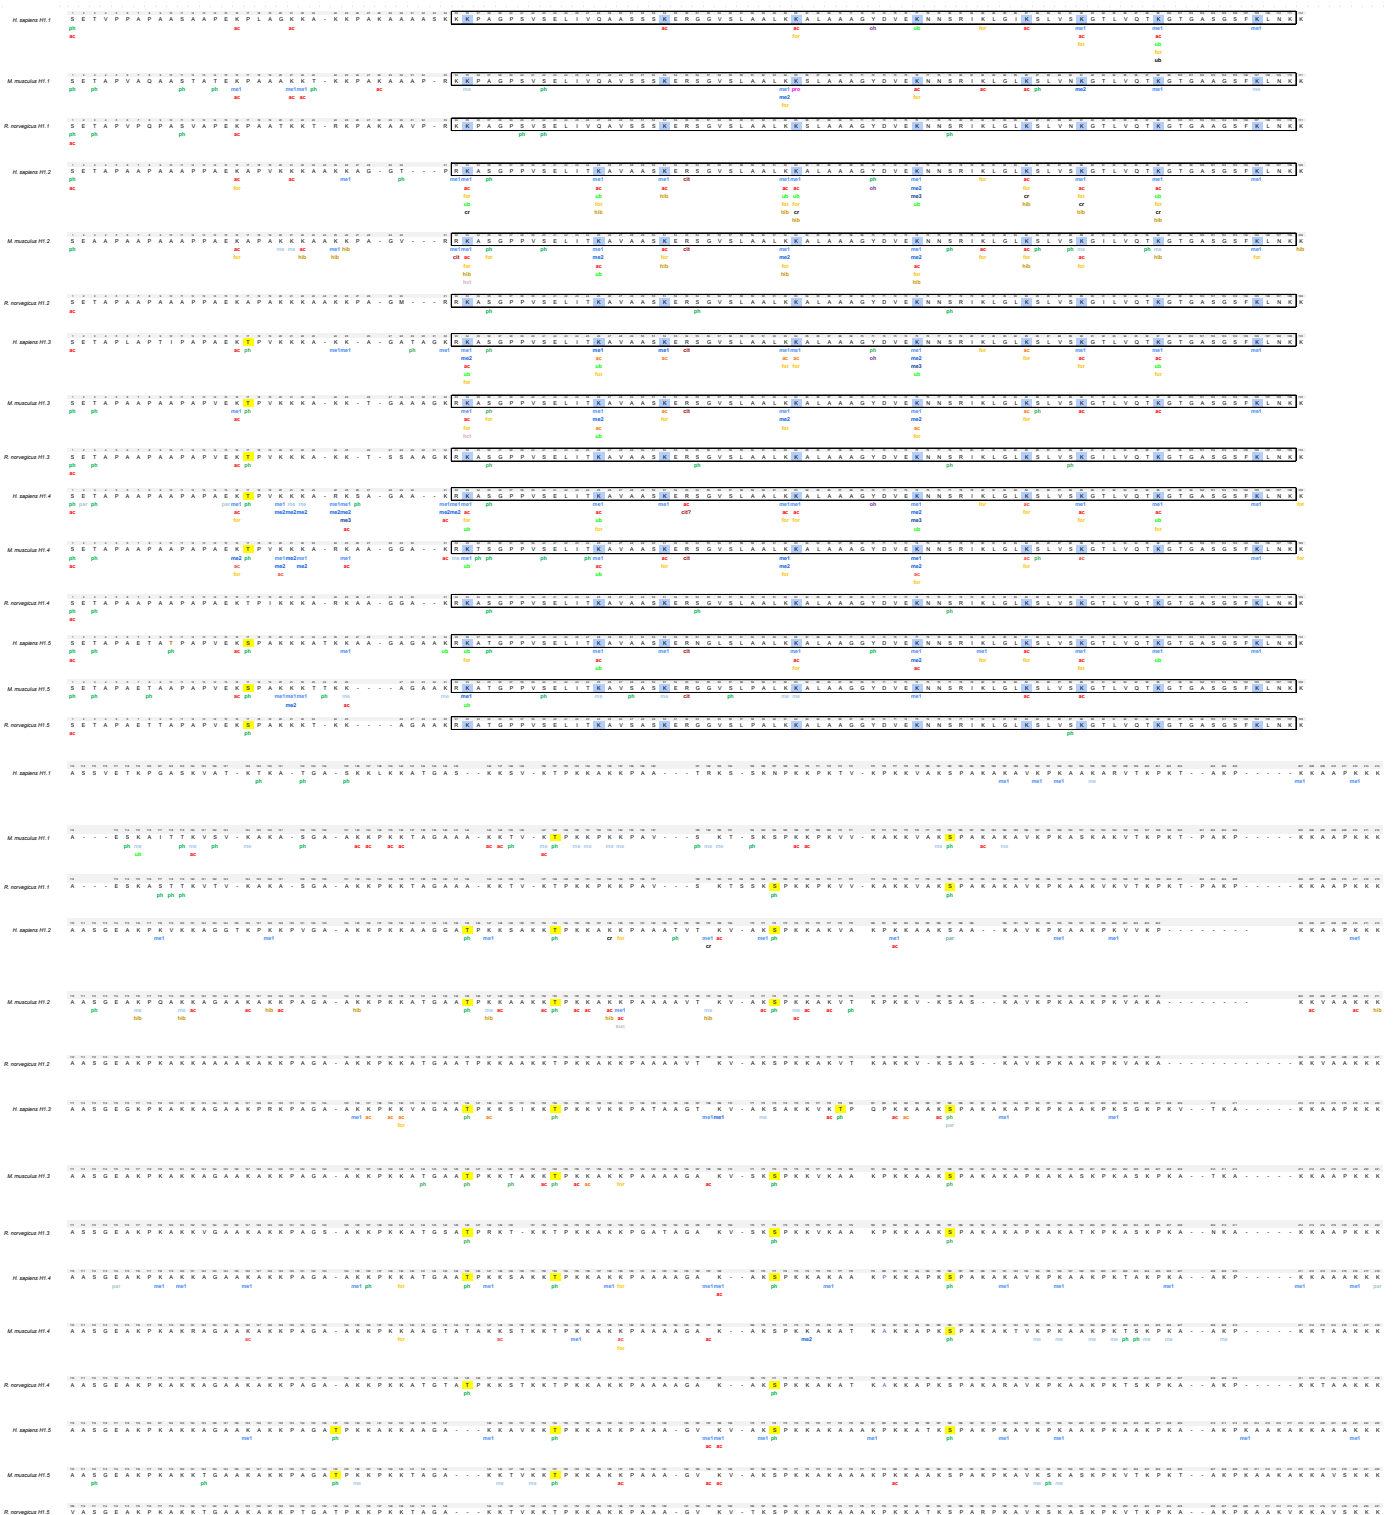

B

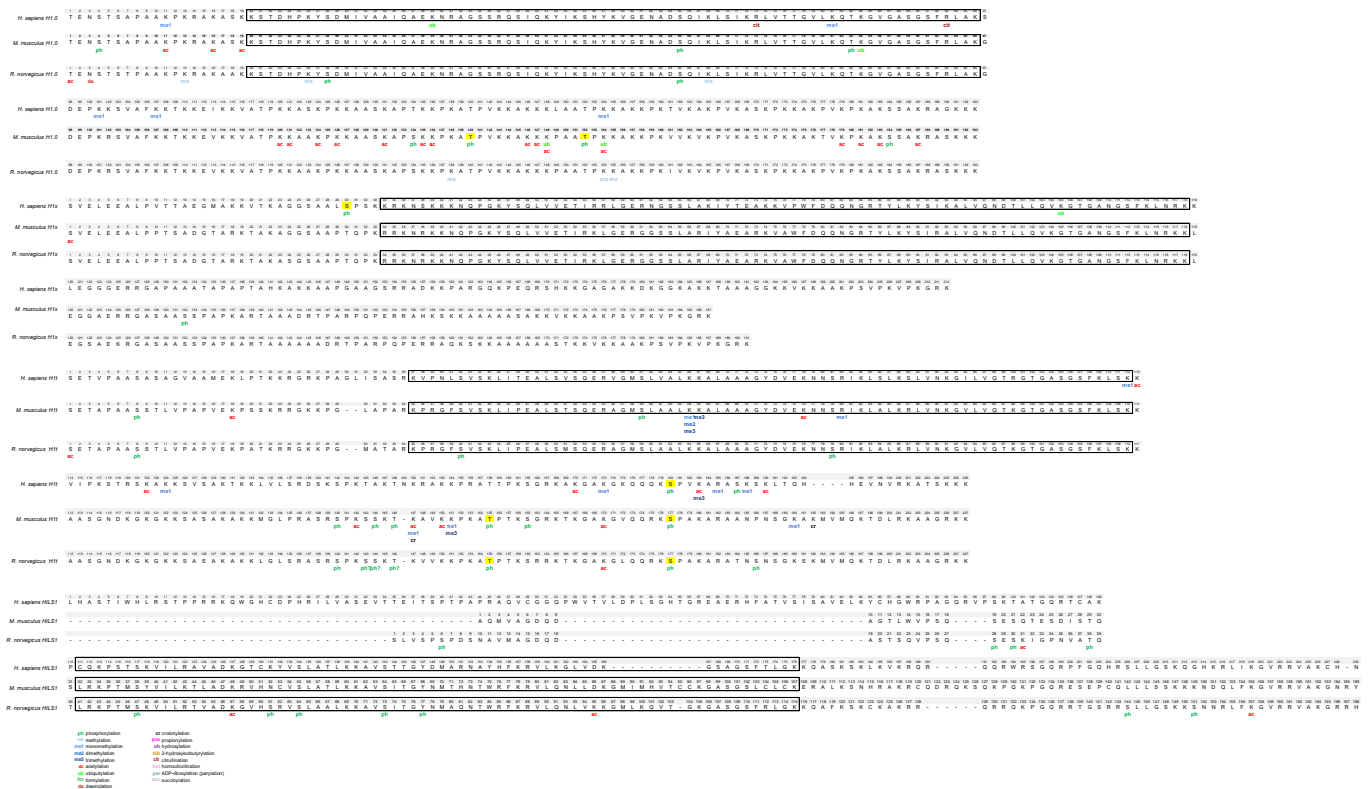

Supplement: s1 [file s1]
